# Supplementary material for: Ab initio molecular dynamics study on the disordered Li–Ga–Sn system
Source: Royal Society of Chemistry journal article supplement (doi:10.1039/d2cp00618a), 2022-01-01
Supplement: d2cp00618a1.pdf [file d2cp00618a1.pdf]

## Supplementary Information

### *Ab initio* molecular dynamics study on disordered Li-Ga-Sn system

An Ding<sup>1</sup>, Bo Han<sup>1</sup>, Shiwei Zhang<sup>1</sup>, Qi Huang<sup>1</sup>, Jianchuan Wang<sup>1,\*</sup>,

Chengyang Wei<sup>2</sup>, Yong Du<sup>1</sup>, Hans J Seifert<sup>3</sup>

<sup>1</sup> State Key Laboratory of Powder Metallurgy, Central South University, 410083,  
Changsha, China

<sup>2</sup> Guangdong Zhaoqing Insititute of Quality Inspection & metrology, 526070,  
Zhaoqing, China

<sup>3</sup> Institute for Applied Materials, Karlsruhe Institute of Technology, 76344,  
Eggenstein-Leopoldshafen, Germany

\* Corresponding author: jcw728@126.com

## Calculation methods for some properties:

### I). Mixing enthalpy, thermal expansion coefficient and open cell voltage

The mixing enthalpy  $\Delta H_{\text{mix}}$  can be calculated by:

$$\Delta H_{\text{mix}}(A_x B_y) = E(A_x B_y) - xE(A) - yE(B), \quad (1)$$

where  $E(A_x B_y)$ ,  $E(A)$  and  $E(B)$  are the free energies of  $A_x B_y$ , A and B, and  $x$  and  $y$  are the molar fractions of A and B, respectively. In our AIMD simulation, the free energy is the time-averaged DFT energy.

The thermal expansion coefficient at constant pressure  $\alpha_v$  can be calculated by <sup>1,2</sup>

$$\alpha_v = \frac{1}{V} \left( \frac{\partial V}{\partial T} \right)_p, \quad (2)$$

where  $V$  is the volume and  $T$  is the absolute temperature. For a specific component and volume at different temperatures, the thermal expansion coefficient can be obtained by calculating the slope of the volume vs. temperature plot.

For an anode material, the open cell voltage is directly related to the difference in the Gibbs free energy between its charged state (lithiated phase) and discharged state (delithiated phase), taking into account the reference state of lithium on the cathode. Due to the small Gibbs free energy difference contributed from entropy and volume, we approximate the voltage using the time-averaged DFT energy differences computed from AIMD; thus, the open cell voltage  $V$  is calculated by:

$$V = - \frac{E(\text{Li}_x - \text{GaSn}) - E(\text{Li}_y - \text{GaSn}) - (x - y)E(\text{Li})}{x - y}, \quad (3)$$

where  $x$  and  $y$  are the number of Li atoms before and after delithiation,  $E(\text{Li}_x - \text{GaSn})$  and  $E(\text{Li}_y - \text{GaSn})$  are the free energies of  $\text{Li}_x - \text{GaSn}$  and  $\text{Li}_y - \text{GaSn}$ , respectively, and  $E(\text{Li})$  is the energy of pure Li per atom, namely, the chemical potential, in liquid Li.

## II). Radial distribution function, structure factor and angular distribution function

As one of the main functions describing the disordered structure, the radial distribution function (RDF)  $g(r)$  represents the probability of finding a particle in a shell  $dr$  at the distance  $r$  from a reference particle, which can be calculated as follows:

$$g(r) = \frac{dN(r)}{4\pi r^2 \rho_0 dr}, \quad (4)$$

where  $\rho_0$  is the atomic number density of the system and  $dN(r)$  is the number of atoms at a distance between  $r$  and  $r + dr$ .

Similarly, for a multivariate system, the partial radial distribution function  $g_{\alpha\beta}$ , also known as the pair correlation function, describes the probability of finding  $\beta$  atoms at the distance of  $r$  from an  $\alpha$  atom:

$$g_{\alpha\beta}(r) = \frac{dN_{\alpha\beta}(r)}{4\pi r^2 \rho_\beta dr}, \quad (5)$$

where  $\rho_\beta$  is the density of species  $\beta$  and  $dN_{\alpha\beta}(r)$  is the number of  $\beta$  atoms in the range of  $r-r+dr$  from  $\alpha$  species.

It is possible to estimate the coordination numbers from the partial pair correlation functions:

$$N_{\alpha\beta} = 4\pi\rho_\beta \int_0^{r_{min}} g_{\alpha\beta}(r)r^2 dr, \quad (6)$$

$r_{min}$  is the position of the first peak valley of the RDF. The coordination number  $N_{\alpha\beta}$  means the number of  $\beta$ -type atoms lying in a sphere of radius  $r_{min}$  centered on an  $\alpha$ -type atom.

Although RDF is an important structural characteristic to describe structural information, it cannot be obtained directly from experimental measurements, and thus, it is difficult to compare the simulated results with experiments. In contrast, structure factors  $S(k)$  are obtained directly in experiments.  $S(k)$  is obtained by the Fourier

transformation from the RDF and is more useful when theoretical predictions are compared with experimental measurements.

To further describe the local structure of the disordered system, we also calculate the angle  $\theta_{ijk}$  among three atoms  $i, j, k$ , where  $j$  is the center atom to obtain the angular distribution function (ADF), which can reflect the bond orientation. The definition of  $\theta_{ijk}$  is as follows:

$$\theta_{ijk} = \left\langle \cos^{-1} \frac{r_{ji}^2 + r_{jk}^2 - r_{ik}^2}{2r_{ji}r_{jk}} \right\rangle. \quad (7)$$

$r$  represents the distance between two atoms within the selected cut-off radius  $r_{\min}$ , and angular brackets denote the average value. Once  $\theta_{ijk}$  is known, we can obtain the ADF  $g(\theta_{ijk})$ , which represents the probability of finding a specific angle  $\theta_{ijk}$  from a cut off radius.

### III). Diffusion coefficient and viscosity

The kinetic properties of molten and liquid metals have played an important role in the mass transport, nucleation and growth of crystals. Combined with MSD, the time-averaged diffusion coefficient for species  $\alpha$  and  $D_\alpha$  can be estimated through the Einstein expression:

$$D_\alpha = \lim_{t \rightarrow \infty} \frac{(MSD)_\alpha}{6t} \quad (8)$$

The final atomic diffusion coefficient of the system is extracted from the slope of the  $MSD$  at long times. Moreover, to minimize the statistical error as much as possible, the  $MSD$  here takes all the time nodes after the system reaches equilibrium as the time origin. The  $MSD$  for species  $\alpha$  is calculated by the following equation:

$$(MSD)_\alpha = \frac{1}{N_\alpha} \left\langle \sum_{i=1}^{N_\alpha} \left| \vec{r}_{ai}(t + t_0) - \vec{r}_{ai}(t_0) \right|^2 \right\rangle, \quad (9)$$

where  $N_\alpha$  is the number of  $\alpha$  atoms,  $\vec{r}_{ai}$  is the position vector of the  $\alpha$  atom after time interval  $t$ , and the angular brackets denote the average over various time origins  $t_0$ .

After obtaining the diffusion coefficient  $D$ , the Arrhenius equation can be used to linearly fit the relationship between  $1/T$  and  $\ln D$  to obtain the diffusion activation energy and the diffusion pre-exponential factor:

$$D = D_0 \exp\left(\frac{-E_a}{k_B T}\right), \quad (10)$$

where  $k_B$  is the Boltzmann constant,  $E_a$  is the activation energy and  $D_0$  is a pre-exponential factor.

Since the viscosity and diffusion coefficient conform to the Stocks-Einstain relationship, it is calculated by the following formula<sup>3</sup>:

$$\mu = \frac{k_B T}{C R_{S-E} D}, \quad (11)$$

where  $C$  is a numerical constant with a value of  $6\pi$ , and  $R_{S-E}$  is the effective particle diffusion radius; here, we take the radius of an atomic sphere.

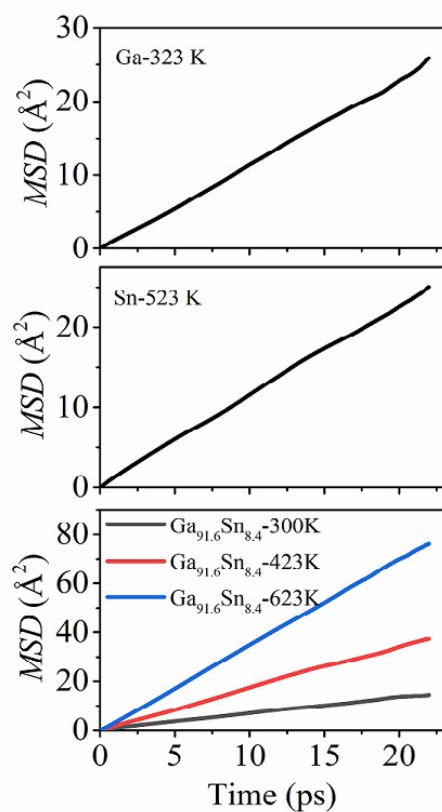

Fig. S1. *MSD* of liquid Ga, Sn and  $\text{Ga}_{91.6}\text{Sn}_{8.4}$  at different temperatures.

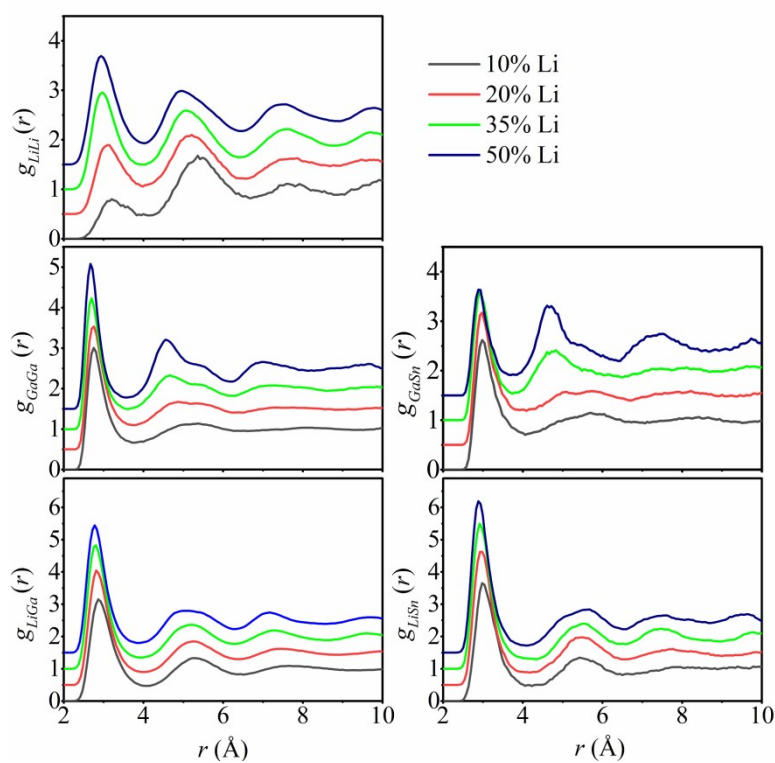

Fig. S2. Partial radial distribution functions of the Li-Ga-Sn system at 423 K. The curves for  $\text{Li}_{20}\text{-GaSn}$ ,  $\text{Li}_{35}\text{-GaSn}$ , and  $\text{Li}_{50}\text{-GaSn}$  are shifted upwards by 0.5, 1, and 1.5,

respectively.

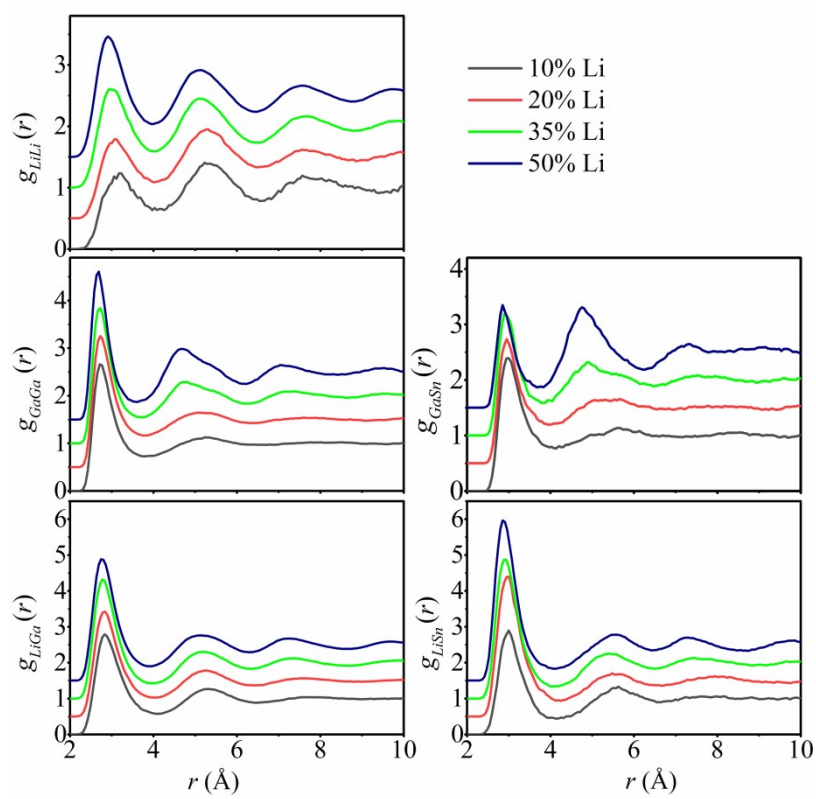

Fig. S3. Partial radial distribution functions of the Li-Ga-Sn system at 623 K. The curves for  $\text{Li}_{20}\text{-GaSn}$ ,  $\text{Li}_{35}\text{-GaSn}$ , and  $\text{Li}_{50}\text{-GaSn}$  are shifted upwards by 0.5, 1, and 1.5, respectively.

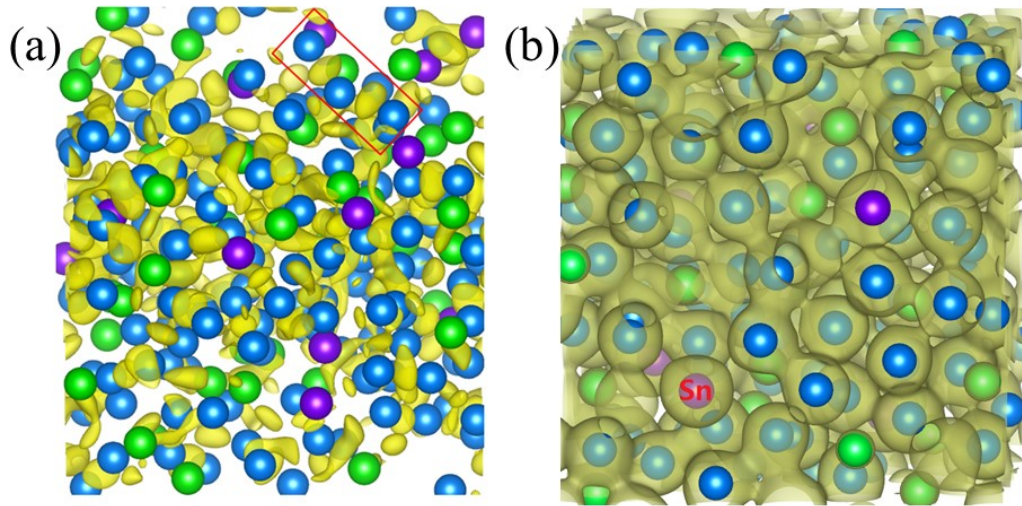

Fig. S4. (a) The charge density difference plot for  $\text{Li}_{20}\text{-GaSn}$  at 300 K with isosurface level of  $0.04e/\text{Bohr}^3$ . The yellow color means positive change of charge density, which represents gain electron. (b) Charge distribution of  $\text{Li}_{20}\text{-GaSn}$  at 300 K with isosurface level of  $0.03e/\text{Bohr}^3$ . The green, blue and pink balls represent Li, Ga and Sn atoms, respectively.

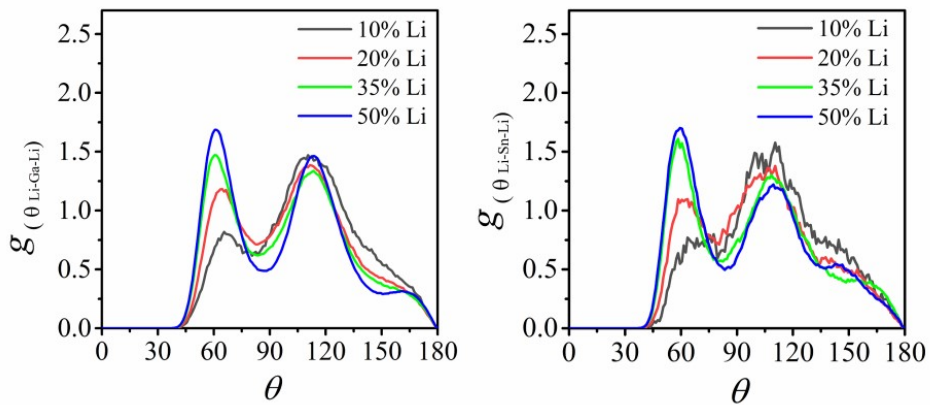

Fig. S5. Calculated angle distribution functions for Li-Ga-Li and Li-Sn-Li in the Li-Ga-Sn system at 423 K.



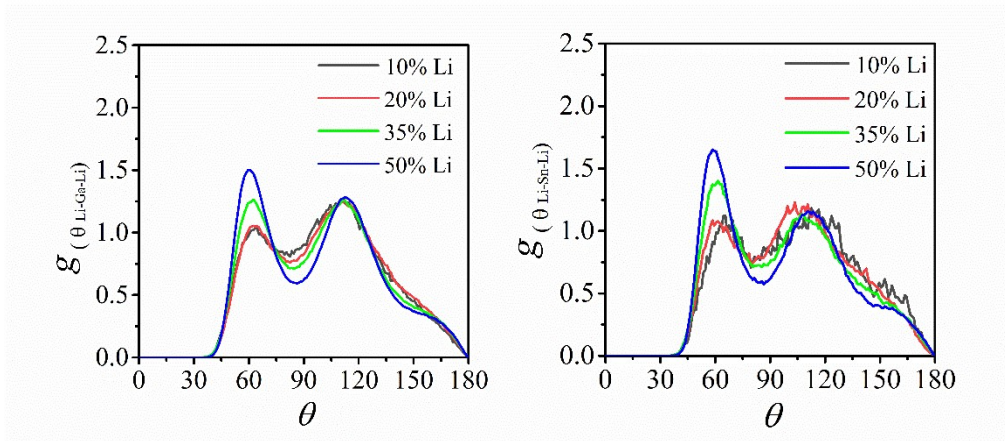

Fig. S6. Calculated angle distribution functions for Li-Ga-Li and Li-Sn-Li in the Li-Ga-Sn system at 623 K.

Table S1. The number of atom used in the simulation of the disordered Li-Ga-Sn system.

| Composition                       | $N_{\text{Li}} : N_{\text{Ga}} : N_{\text{Sn}}$ |
|-----------------------------------|-------------------------------------------------|
| $\text{Ga}_{91.6}\text{Sn}_{8.4}$ | 0 : 183 : 17                                    |
| $\text{Li}_{10}\text{-GaSn}$      | 20 : 165 : 15                                   |
| $\text{Li}_{20}\text{-GaSn}$      | 40 : 147 : 13                                   |
| $\text{Li}_{35}\text{-GaSn}$      | 70 : 119 : 11                                   |
| $\text{Li}_{50}\text{-GaSn}$      | 100 : 92 : 8                                    |

Table S2. Diffusion activation energy  $E_a$  and pre-exponential  $D_0$  of the Li-Ga-Sn system at various temperatures.

| Composition            | $E_a$ (kJ/mol) |       |       | $D_0$ ( $10^{-5}$ cm <sup>2</sup> /s) |       |       |
|------------------------|----------------|-------|-------|---------------------------------------|-------|-------|
|                        | Li             | Ga    | Sn    | Li                                    | Ga    | Sn    |
| Li <sub>10</sub> -GaSn | 11.79          | 10.98 | 11.21 | 22.60                                 | 33.04 | 24.23 |
| Li <sub>20</sub> -GaSn | 12.4           | 10.91 | 9.61  | 19.85                                 | 22.21 | 13.09 |
| Li <sub>35</sub> -GaSn | 13.15          | 12.74 | 7.02  | 11.23                                 | 11.65 | 0.96  |
| Li <sub>50</sub> -GaSn | 17.52          | 16.16 | 15.46 | 23.71                                 | 10.97 | 6.00  |

## References

1. A. Bengtson, H. O. Nam, S. Saha, R. Sakidja and D. Morgan, First-principles molecular dynamics modeling of the LiCl–KCl molten salt system, *Comput. Mater. Sci.*, 2014, **83**, 362-370.
2. C. Woodward, M. Asta, D. R. Trinkle and J. Lill, Ab initio simulations of molten Ni alloys, *J. Appl. Phys.*, 2010, **107**(11), 1861-1888.
3. Frenkel and I. Ia., *Kinetic theory of liquids*, Dover Publications, 1955.
